# Supplementary material for: Towards Profiling of the G-Quadruplex Targeting Drugs in the Living Human Cells Using NMR Spectroscopy
Source: MDPI journal article supplement (doi:10.3390/ijms22116042), 2021-06-03
Supplement: s1 [file s1]

## Supporting Information

# Towards Profiling of the G-Quadruplex Targeting Drugs in the Living Human Cells Using NMR Spectroscopy

Daniel Krafčík<sup>1,2</sup>, Eva Ištvaníková<sup>1,2</sup>, Šimon Džatko<sup>1,2</sup>, Pavlína Víšková<sup>1,2</sup>, Silvie Foldynová-Trantírková<sup>3,\*</sup> and Lukáš Trantírek<sup>1,\*</sup>

<sup>1</sup> Central European Institute of Technology, Masaryk University, Kamenice 753/5, 625 00 Brno, Czech Republic; daniel.krafcik@ceitec.muni.cz (D.K.); eva.maturova@ceitec.muni.cz (E.I.); simon.dzatko@ceitec.muni.cz (Š.D.); pavlina.viskova@ceitec.muni.cz (P.V.)

<sup>2</sup> National Centre for Biomolecular Research, Masaryk University, Kamenice 5, 625 00 Brno, Czech Republic

<sup>3</sup> Institute of Biophysics, Czech Academy of Sciences, Královopolská 135, 612 65 Brno, Czech Republic

\* Correspondence: silvie.trantirkova@ceitec.muni.cz (S.F.-T.); lukas.trantirek@ceitec.muni.cz (L.T.)

**Table S1.** List of DNA oligonucleotides used.

| Name   | Sequence |        |        |       |
|--------|----------|--------|--------|-------|
| Tel21T | GGGTTA   | GGGTTA | GGGTTT | GGG   |
| Bcl2   | GGGCAG   | GAGGGC | TCTGGG | TGGGT |
| KRAS   | AGGGCG   | GTGTGG | GAATAG | GGAA  |

**BRACO19**

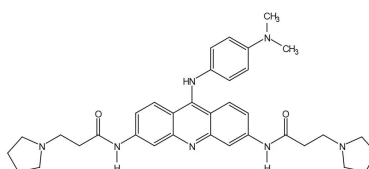

**PhenDC3**

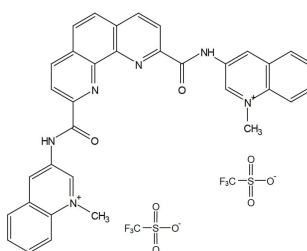

**NMM**

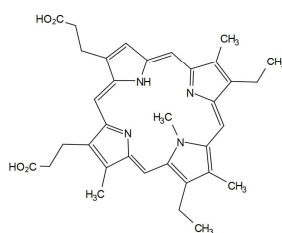

**Figure S1.** G-quadruplex-binding ligands used in the study.

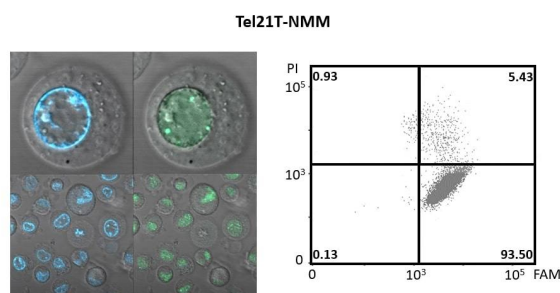

**Figure S2.** (Left) Confocal microscopy images of RPE cells transfected with Tel21T-NMM. The green color indicates the localization of (FAM)-DNA/(FAM)-DNA-ligand complex. The blue color corresponds to a cell nucleus stained by Hoechst 33342. (Right) Double staining (PI/FAM) FCM analysis of transfected RPE cells with the Tel21T-NMM complex. Percentages (the numbers in the FCM plots) of viable non-transfected cells, viable DNA/DNA-ligand containing cells, non-transfected dead/compromised cells, and transfected dead/compromised cells containing DNA/DNA-ligand are indicated in left-bottom, right-bottom, left-top, and right-top quadrants, respectively.

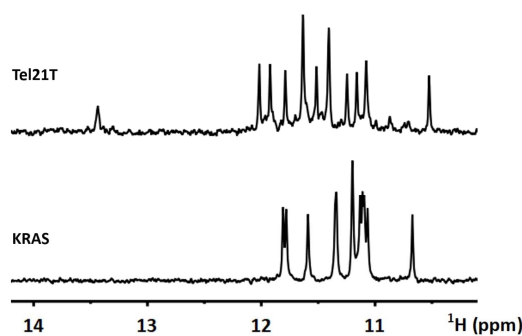

**Figure S3.** Imino regions of 1D <sup>1</sup>H NMR spectra of Tel21T and KRAS acquired in K<sup>+</sup> buffer (70 mM KCl, 20 mM KPO<sub>4</sub>, pH = 7.0).

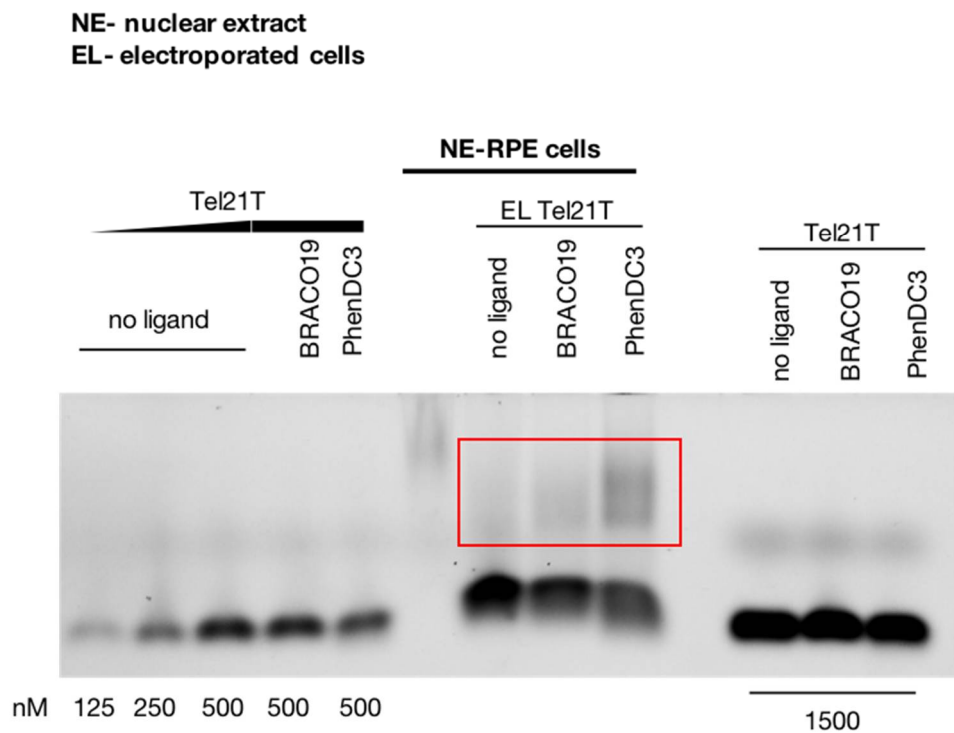

**Figure S4.** FAM-Tel21T  $\pm$  ligands in the nuclear extracts from electroporated RPE cells separated on 0.8% agarose gel/1x TBE. Red box highlights putative complexes between Tel21T and nuclear proteins.
